# Supplementary material for: Methyl-CpG-binding (SmMBD2/3) and chromobox (SmCBX) proteins are required for neoblast proliferation and oviposition in the parasitic blood fluke Schistosoma mansoni
Source: PLoS Pathog. 2018 Jun 28;14(6):e1007107. doi: 10.1371/journal.ppat.1007107 (PMC6023120; doi:10.1371/journal.ppat.1007107)
Supplement: S1 Table — (XLSX) [file ppat.1007107.s001.xlsx]

## Sheet: Sheet1
	Name	Forward Oligo Sequence (5'-3')	Reverse Oligo Sequence (5'-3')
	SmCBX qRT-PCR	CTAGTCCTGCCAGAACTTCAAG	TCTTCCACACTCACGGGTAT
	SmMBD2/3 qRT-PCR	CGGTTATTGTACGTTCTCATCC	CAGCACTCTGTATTCCTTTAGGC
	SmAT1 qRT-PCR	CTTCGAACCAGCAAATCAGA	GACACCAATCCACAAACTGG
	siRNA Luciferase	CUUACGCUGAGUACUUCGA[dT][dT][dT]	UCGAAGUACUCAGCGUAAG[dT][dT][dT]
	siRNA SmMBD2/3	CAUUAAACCGGUUAUUGUA[dT][dT]	UACAAUAACCGGUUUAAUG[dT][dT]
	siRNA SmCBX	GGAAGAGUCAGCUGGUGAA[dT][dT]	UUCACCAGCUGACUCUUCC[dT][dT]
	S1 Table. Reverse transcription quantitative real time PCR (qRT-PCR) and small interfering RNA (siRNA) oligonucleotide sequences used in this study.
