# Supplementary material for: Methyl-CpG-binding (SmMBD2/3) and chromobox (SmCBX) proteins are required for neoblast proliferation and oviposition in the parasitic blood fluke Schistosoma mansoni
Source: PLoS Pathog. 2018 Jun 28;14(6):e1007107. doi: 10.1371/journal.ppat.1007107 (PMC6023120; doi:10.1371/journal.ppat.1007107)
Supplement: S2 Table — (XLSX) [file ppat.1007107.s002.xlsx]

## Sheet: Sheet1
		Protein ID	Smp Identifier (S. mansoni genome v 5.2)	Number of in frame hits identified
		Chromobox protein	Smp_179650	5
		Eggshell precursor protein	Smp_000430	3
		Ribosomal protein S11	Smp_032760	2
		Hypothetical protein	Smp_153630	2
		Chaperonin containing t-complex protein 1, ⍷ subunit	Smp_063420	1
		Heat shock protein 70	Smp_106930	1
		S2 Table. SmMBD2/3 interacting proteins identified in this study.
