# Supplementary material for: Methyl-CpG-binding (SmMBD2/3) and chromobox (SmCBX) proteins are required for neoblast proliferation and oviposition in the parasitic blood fluke Schistosoma mansoni
Source: PLOS journal article supplement (doi:10.1371/journal.ppat.1007107), 2018-06-28

A

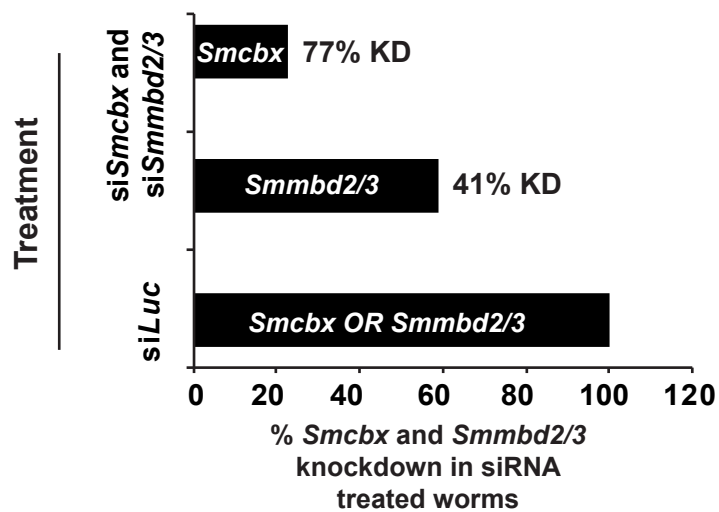

B

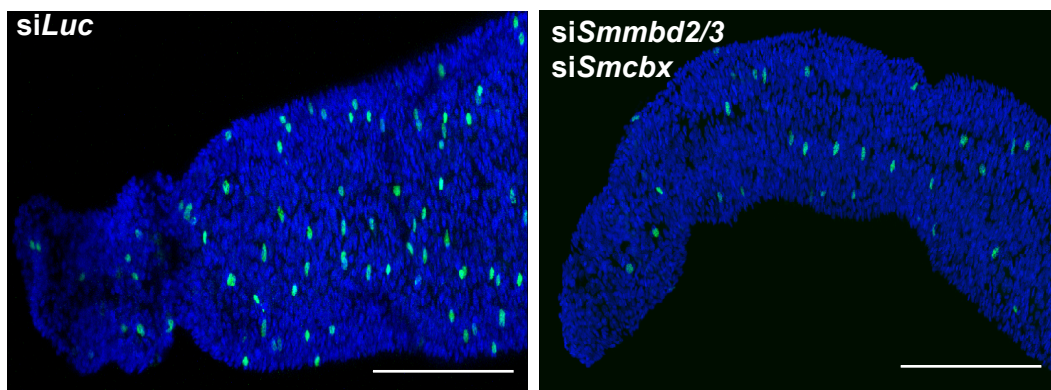

C

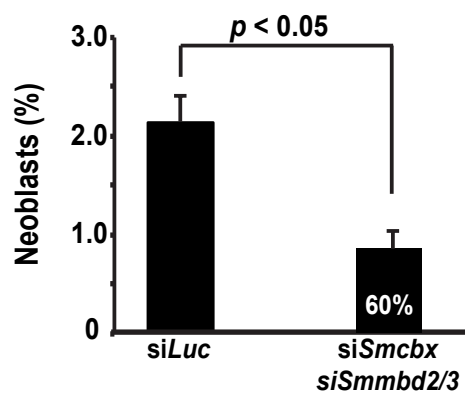

Supplement: S4 (10.1371/journal.ppat.1007107.s004) [file journal.ppat.1007107.s004]
